# Supplementary material for: Unraveling the Role of Histone Variant CENP-A and Chaperone HJURP Expression in Thymic Epithelial Neoplasms
Source: MDPI journal article supplement (doi:10.3390/ijms23158339), 2022-07-28

**Figure S1.** (A) Positivity rate of DAXX in epithelial cells according to the WHO histological subtype (Fischer exact test,  $p = 0.04$ ). (B) DAXX H-score according to Masaoka-Koga Stage (Kwallis ANOVA,  $p > 0.10$ ). (C) Kaplan-Meier survival curves according to DAXX H-score (log-rank test,  $p > 0.10$ ).

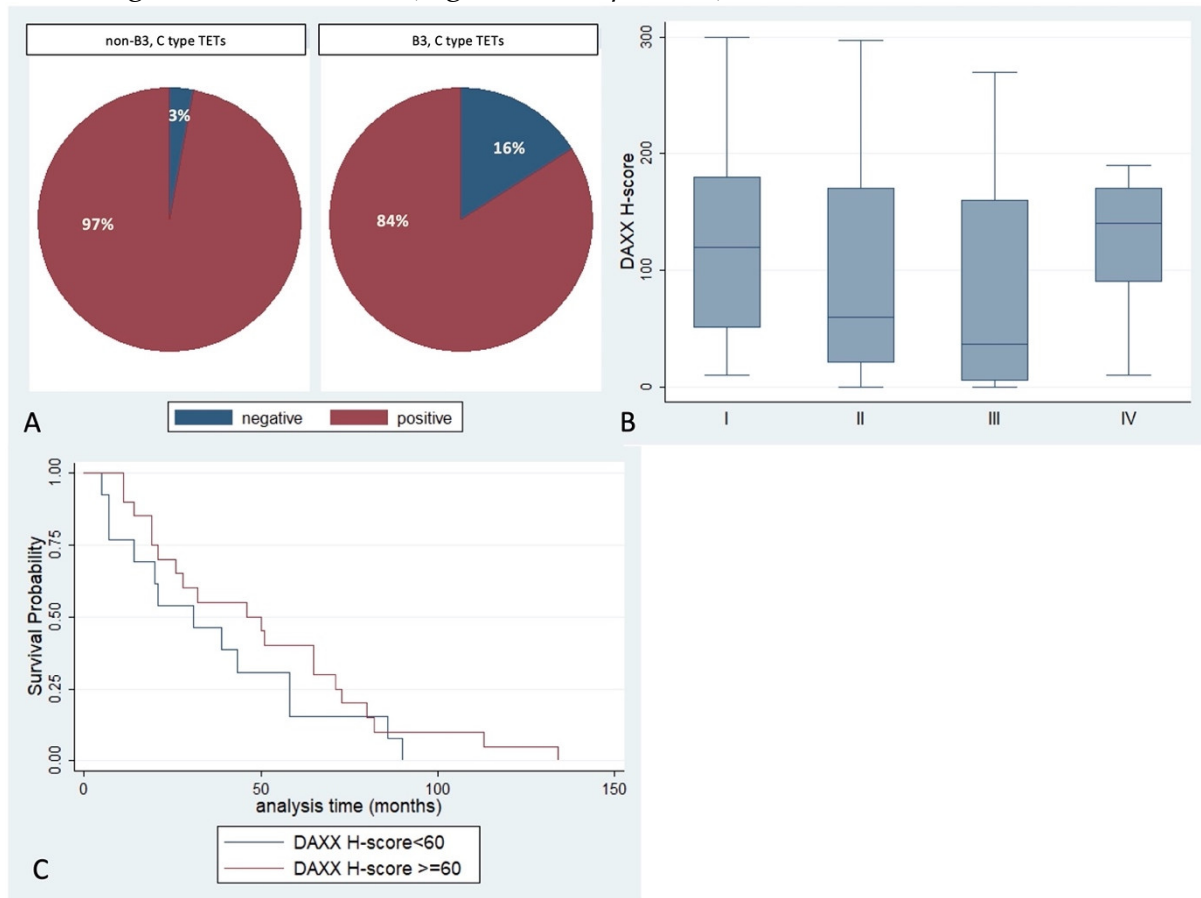

Supplement: s1 [file s1]
